# Supplementary material for: Macrophage Inflammatory Proteins (MIPs) Contribute to Malignant Potential of Colorectal Polyps and Modulate Likelihood of Cancerization Associated with Standard Risk Factors
Source: MDPI journal article supplement (doi:10.3390/ijms25031383), 2024-01-23
Supplement: s1 [file s1]

## Supplementary Material

# Macrophage Inflammatory Proteins (MIPs) Contribute to Malignant Potential of Colorectal Polyps and Modulate Likelihood of Cancerization Associated with Standard Risk Factors

Jarosław Wierzbicki, Iwona Bednarz-Misa, Łukasz Lewandowski, Artur Lipiński, Anna Kłopot, Katarzyna Neubauer and Małgorzata Krzystek-Korpacka

**Table S1.** Cumulative probabilities for histological type as predicted ordinal state

| Gene: CCL3                                         |          |                |                    |                    |                    |                          |         |
|----------------------------------------------------|----------|----------------|--------------------|--------------------|--------------------|--------------------------|---------|
| Feature                                            | $\phi_i$ | $\Phi_i$<br>SD | Wald<br>statistics | $\Phi_i$<br>95% CI | $\Phi_i$<br>95% CI | Predicted<br>probability | p-value |
| Intercept 1 (predicted state: AC)                  | -1.8111  | 0.1873         | 93.489             | -2.1782            | -1.4440            | 0.035                    | <0.001  |
| Intercept 2 (predicted states: V or AC)            | -0.7650  | 0.1264         | 36.616             | -1.0128            | -0.5172            | 0.222                    | <0.001  |
| Intercept 3 (predicted states: TV or V or AC)      | 1.1301   | 0.1458         | 60.078             | 0.8443             | 1.4158             | 0.871                    | <0.001  |
| Intercept 4 (predicted states: T or TV or V or AC) | 1.8638   | 0.2245         | 68.939             | 1.4238             | 2.3037             | 0.969                    | <0.001  |
| CCL3 normal                                        | -0.0044  | 0.0030         | 2.118              | -0.0103            | 0.0015             | -                        | 0.146   |
| CCL3 lesion                                        | 0.0299   | 0.0500         | 0.358              | -0.0681            | 0.1279             | -                        | 0.550   |
| CCL3 lesion/normal                                 | 0.0741   | 0.0509         | 2.119              | -0.0257            | 0.1738             | -                        | 0.145   |
| CCL3 normal×CCL3 lesion×CCL3 lesion/normal         | -0.0003  | 0.0001         | 6.263              | -0.0006            | -0.0001            | -                        | 0.012   |
| CCL3 normal×CCL3 lesion                            | 0.0078   | 0.0109         | 0.521              | -0.0134            | 0.0291             | -                        | 0.470   |
| Gene: CCL4                                         |          |                |                    |                    |                    |                          |         |
| Feature                                            | $\phi_i$ | $\Phi_i$<br>SD | Wald<br>statistics | $\Phi_i$<br>95% CI | $\Phi_i$<br>95% CI | Predicted<br>probability | p-value |
| Intercept 1 (predicted state: AC)                  | -1.605   | 0.1654         | 94.163             | -1.9292            | -1.2808            | 0.054                    | <0.001  |
| Intercept 2 (predicted states: V or AC)            | -0.615   | 0.1112         | 30.593             | -0.8327            | -0.3970            | 0.269                    | <0.001  |
| Intercept 3 (predicted states: TV or V or AC)      | 1.251    | 0.1386         | 81.454             | 0.9793             | 1.5226             | 0.895                    | <0.001  |
| Intercept 4 (predicted states: T or TV or V or AC) | 1.982    | 0.2206         | 80.755             | 1.5498             | 2.4144             | 0.976                    | <0.001  |
| CCL4 normal                                        | -0.010   | 0.0061         | 2.864              | -0.0222            | 0.0016             | -                        | 0.091   |
| CCL4 lesion                                        | -0.024   | 0.0103         | 5.412              | -0.0440            | -0.0038            | -                        | 0.020   |
| CCL4 lesion/normal                                 | -        | -              | -                  | -                  | -                  | -                        | 0.105   |
| CCL4 normal×CCL4 lesion×CCL4 lesion/normal         | -        | -              | -                  | -                  | -                  | -                        | 0.622   |

| CCL4 normal×CCL4 lesion                            | 0.025     | 0.0098           | 6.428                      | 0.0057               | 0.0441               | -                                | 0.011          |
|----------------------------------------------------|-----------|------------------|----------------------------|----------------------|----------------------|----------------------------------|----------------|
| <b>Gene: CXCL2</b>                                 |           |                  |                            |                      |                      |                                  |                |
| <b>Feature</b>                                     | <b>φi</b> | <b>Φi<br/>SD</b> | <b>Wald<br/>statistics</b> | <b>Φi<br/>95% CI</b> | <b>Φi<br/>95% CI</b> | <b>Predicted<br/>probability</b> | <b>p-value</b> |
| Intercept 1 (predicted state: AC)                  | -1.4610   | 0.1614           | 81.960                     | -1.7773              | -1.1447              | 0.072                            | <0.001         |
| Intercept 2 (predicted states: V or AC)            | -0.4913   | 0.1132           | 18.827                     | -0.7133              | -0.2694              | 0.312                            | <0.001         |
| Intercept 3 (predicted states: TV or V or AC)      | 1.3745    | 0.1469           | 87.591                     | 1.0866               | 1.6623               | 0.915                            | <0.001         |
| Intercept 4 (predicted states: T or TV or V or AC) | 2.1279    | 0.2340           | 82.668                     | 1.6692               | 2.5867               | 0.983                            | <0.001         |
| CXCL2 normal                                       | -0.0614   | 0.0271           | 5.133                      | -0.1146              | -0.0083              | -                                | 0.023          |
| CXCL2 lesion                                       | -0.0048   | 0.0088           | 0.301                      | -0.0220              | 0.0124               | -                                | 0.583          |
| CXCL2 lesion/normal                                | -         | -                | -                          | -                    | -                    | -                                | 0.807          |
| CXCL2 normal×CXCL2 lesion×CXCL2 lesion/normal      | -         | -                | -                          | -                    | -                    | -                                | 0.387          |
| CXCL2 normal×CXCL2 lesion                          | -         | -                | -                          | -                    | -                    | -                                | 0.963          |
| <b>Gene: CCL19</b>                                 |           |                  |                            |                      |                      |                                  |                |
| <b>Feature</b>                                     | <b>φi</b> | <b>Φi<br/>SD</b> | <b>Wald<br/>statistics</b> | <b>Φi<br/>95% CI</b> | <b>Φi<br/>95% CI</b> | <b>Predicted<br/>probability</b> | <b>p-value</b> |
| Intercept 1 (predicted state: AC)                  | -1.6216   | 0.1722           | 88.675                     | -1.9592              | -1.2841              | 0.052                            | <0.001         |
| Intercept 2 (predicted states: V or AC)            | -0.6196   | 0.1185           | 27.354                     | -0.8518              | -0.3874              | 0.268                            | <0.001         |
| Intercept 3 (predicted states: TV or V or AC)      | 1.2466    | 0.1438           | 75.164                     | 0.9648               | 1.5284               | 0.894                            | <0.001         |
| Intercept 4 (predicted states: T or TV or V or AC) | 1.9731    | 0.2211           | 79.603                     | 1.5397               | 2.4065               | 0.976                            | <0.001         |
| CCL19 normal                                       | -0.0066   | 0.0057           | 1.354                      | -0.0177              | 0.0045               | -                                | 0.245          |
| CCL19 lesion                                       | -0.0083   | 0.0125           | 0.441                      | -0.0328              | 0.0162               | -                                | 0.507          |
| CCL19 lesion/normal                                | -         | -                | -                          | -                    | -                    | -                                | 0.616          |
| CCL19 normal×CCL19 lesion×CCL19 lesion/normal      | -         | -                | -                          | -                    | -                    | -                                | 0.134          |
| CCL19 normal×CCL19 lesion                          | 0.0046    | 0.0018           | 6.466                      | 0.0010               | 0.0081               | -                                | 0.011          |

SD, standard deviation; CI, confidence interval; AC, adenocarcinoma in the polyp; V, villous adenomas; TV, tubulo-villous adenomas; T, tubular adenomas

**Table S2.** Cumulative probabilities for dysplasia grade as predicted ordinal state

| <b>Gene: CCL3</b>                              |                            |                                   |                            |                                       |                                       |                                  |                |
|------------------------------------------------|----------------------------|-----------------------------------|----------------------------|---------------------------------------|---------------------------------------|----------------------------------|----------------|
| <b>Feature</b>                                 | <b><math>\phi_i</math></b> | <b><math>\Phi_i</math><br/>SD</b> | <b>Wald<br/>statistics</b> | <b><math>\Phi_i</math><br/>95% CI</b> | <b><math>\Phi_i</math><br/>95% CI</b> | <b>Predicted<br/>probability</b> | <b>p-value</b> |
| Intercept 1 (predicted state: AC)              | -1.8769                    | 0.2006                            | 87.521                     | -2.2701                               | -1.4837                               | 0.030                            | <0.001         |
| Intercept 2 (Predicted states: HGD or AC)      | 0.6741                     | 0.1276                            | 27.911                     | 0.4240                                | 0.9241                                | 0.750                            | <0.001         |
| Intercept 3 (Predicted states: LGD, HGD or AC) | 1.7886                     | 0.2186                            | 66.923                     | 1.3600                                | 2.2171                                | 0.963                            | <0.001         |
| CCL3 normal                                    | 0.0007                     | 0.0034                            | 0.037                      | -0.0060                               | 0.0073                                | -                                | 0.847          |
| CCL3 lesion                                    | 0.0046                     | 0.0522                            | 0.008                      | -0.0976                               | 0.1068                                | -                                | 0.930          |
| CCL3 lesion/normal                             | 0.123                      | 0.0577                            | 4.524                      | 0.0096                                | 0.2359                                | -                                | 0.033          |
| CCL3 normal×CCL3 lesion×CCL3 lesion/normal     | -0.0004                    | 0.0001                            | 8.165                      | -0.0007                               | -0.0001                               | -                                | 0.004          |
| CCL3 normal×CCL3 lesion                        | 0.0076                     | 0.0123                            | 0.378                      | -0.0166                               | 0.0317                                | -                                | 0.539          |
| <b>Gene: CCL4</b>                              |                            |                                   |                            |                                       |                                       |                                  |                |
| <b>Feature</b>                                 | <b><math>\phi_i</math></b> | <b><math>\Phi_i</math><br/>SD</b> | <b>Wald<br/>statistics</b> | <b><math>\Phi_i</math><br/>95% CI</b> | <b><math>\Phi_i</math><br/>95% CI</b> | <b>Predicted<br/>probability</b> | <b>p-value</b> |
| Intercept 1 (predicted state: AC)              | -1.5506                    | 0.1599                            | 94.095                     | -1.8639                               | -1.2373                               | 0.060                            | <0.001         |
| Intercept 2 (Predicted states: HGD or AC)      | 0.8471                     | 0.1167                            | 52.665                     | 0.6183                                | 1.0758                                | 0.802                            | <0.001         |
| Intercept 3 (Predicted states: LGD, HGD or AC) | 1.9470                     | 0.2131                            | 83.453                     | 1.5293                                | 2.3647                                | 0.974                            | <0.001         |
| CCL4 normal                                    | 0.0007                     | 0.0064                            | 0.013                      | -0.0118                               | 0.0132                                | -                                | 0.908          |
| CCL4 lesion                                    | 0.0034                     | 0.0045                            | 0.574                      | -0.0054                               | 0.0122                                | -                                | 0.449          |
| CCL4 lesion/normal                             | -                          | -                                 | -                          | -                                     | -                                     | -                                | 0.839          |
| CCL4 normal×CCL4 lesion×CCL4 lesion/normal     | -                          | -                                 | -                          | -                                     | -                                     | -                                | 0.133          |
| CCL4 normal×CCL4 lesion                        | -                          | -                                 | -                          | -                                     | -                                     | -                                | 0.118          |
| <b>Gene: CXCL2</b>                             |                            |                                   |                            |                                       |                                       |                                  |                |
| <b>Feature</b>                                 | <b><math>\phi_i</math></b> | <b><math>\Phi_i</math><br/>SD</b> | <b>Wald<br/>statistics</b> | <b><math>\Phi_i</math><br/>95% CI</b> | <b><math>\Phi_i</math><br/>95% CI</b> | <b>Predicted<br/>probability</b> | <b>p-value</b> |
| Intercept 1 (predicted state: AC)              | -1.4803                    | 0.1613                            | 84.222                     | -1.7964                               | -1.1641                               | 0.069                            | <0.001         |
| Intercept 2 (Predicted states: HGD or AC)      | 0.9356                     | 0.1254                            | 55.705                     | 0.6899                                | 1.1813                                | 0.825                            | <0.001         |
| Intercept 3 (Predicted states: LGD, HGD or AC) | 2.0489                     | 0.2243                            | 83.411                     | 1.6092                                | 2.4886                                | 0.980                            | <0.001         |

| CXCL2 normal                                   | -0.0427   | 0.0261           | 2.682                      | -0.0937              | 0.0084               | -                                | 0.101          |
|------------------------------------------------|-----------|------------------|----------------------------|----------------------|----------------------|----------------------------------|----------------|
| CXCL2 lesion                                   | -0.0025   | 0.0094           | 0.074                      | -0.0209              | 0.0158               | -                                | 0.785          |
| CXCL2 lesion/normal                            | -         | -                | -                          | -                    | -                    | -                                | 0.736          |
| CXCL2 normal×CXCL2 lesion×CXCL2 lesion/normal  | -         | -                | -                          | -                    | -                    | -                                | 0.550          |
| CXCL2 normal×CXCL2 lesion                      | -         | -                | -                          | -                    | -                    | -                                | 0.223          |
| <b>Gene: CCL19</b>                             |           |                  |                            |                      |                      |                                  |                |
| <b>Feature</b>                                 | <b>φi</b> | <b>Φi<br/>SD</b> | <b>Wald<br/>statistics</b> | <b>Φi<br/>95% CI</b> | <b>Φi<br/>95% CI</b> | <b>Predicted<br/>probability</b> | <b>p-value</b> |
| Intercept 1 (predicted state: AC)              | -1.6352   | 0.1737           | 88.648                     | -1.9757              | -1.2948              | 0.051                            | <0.001         |
| Intercept 2 (Predicted states: HGD or AC)      | 0.7901    | 0.1247           | 40.119                     | 0.5456               | 1.0346               | 0.785                            | <0.001         |
| Intercept 3 (Predicted states: LGD, HGD or AC) | 1.9038    | 0.2190           | 75.602                     | 1.4747               | 2.3330               | 0.972                            | <0.001         |
| CCL19 normal                                   | 0.0037    | 0.0058           | 0.417                      | -0.0076              | 0.0150               | -                                | 0.519          |
| CCL19 lesion                                   | 0.0165    | 0.0103           | 2.582                      | -0.0036              | 0.0367               | -                                | 0.108          |
| CCL19 lesion/normal                            | -         | -                | -                          | -                    | -                    | -                                | 0.870          |
| CCL19 normal×CCL19 lesion×CCL19 lesion/normal  | -         | -                | -                          | -                    | -                    | -                                | 0.419          |
| CCL19 normal×CCL19 lesion                      | -         | -                | -                          | -                    | -                    | -                                | 0.068          |

SD, standard deviation; CI, confidence interval; AC, adenocarcinoma in the polyp; HGD, high-grade dysplasia; LGD, low-grade dysplasia.

**Table S3.** Cumulative probabilities for polyp size as predicted ordinal state

| <b>Gene: CCL3</b>                                          |                            |                                   |                            |                                       |                                       |                                  |                |
|------------------------------------------------------------|----------------------------|-----------------------------------|----------------------------|---------------------------------------|---------------------------------------|----------------------------------|----------------|
| <b>Feature</b>                                             | <b><math>\phi_i</math></b> | <b><math>\Phi_i</math><br/>SD</b> | <b>Wald<br/>statistics</b> | <b><math>\Phi_i</math><br/>95% CI</b> | <b><math>\Phi_i</math><br/>95% CI</b> | <b>Predicted<br/>probability</b> | <b>p-value</b> |
| Intercept 1 (predicted state: $\geq 20$ mm)                | -0.7321                    | 0.1122                            | 42.562                     | -0.9520                               | -0.5121                               | 0.232                            | <0.001         |
| Intercept 2 (predicted states: 10 – 19 mm or $\geq 20$ mm) | 0.4624                     | 0.1057                            | 19.147                     | 0.2553                                | 0.6694                                | 0.678                            | <0.001         |
| CCL3 normal                                                | -0.0057                    | 0.0059                            | 0.932                      | -0.0173                               | 0.0059                                | -                                | 0.334          |
| CCL3 lesion                                                | 0.0005                     | 0.0026                            | 0.042                      | -0.0045                               | 0.0056                                | -                                | 0.838          |
| CCL3 lesion/normal                                         | -                          | -                                 | -                          | -                                     | -                                     | -                                | 0.333          |
| CCL3 normal×CCL3 lesion×CCL3 lesion/normal                 | -                          | -                                 | -                          | -                                     | -                                     | -                                | 0.185          |
| CCL3 normal×CCL3 lesion                                    | -                          | -                                 | -                          | -                                     | -                                     | -                                | 0.320          |
| <b>Gene: CCL4</b>                                          |                            |                                   |                            |                                       |                                       |                                  |                |
| <b>Feature</b>                                             | <b><math>\phi_i</math></b> | <b><math>\Phi_i</math><br/>SD</b> | <b>Wald<br/>statistics</b> | <b><math>\Phi_i</math><br/>95% CI</b> | <b><math>\Phi_i</math><br/>95% CI</b> | <b>Predicted<br/>probability</b> | <b>p-value</b> |
| Intercept 1 (predicted state: $\geq 20$ mm)                | -0.7232                    | 0.1138                            | 40.414                     | -0.9461                               | -0.5002                               | 0.235                            | <0.001         |
| Intercept 2 (predicted states: 10 – 19 mm or $\geq 20$ mm) | 0.4723                     | 0.1077                            | 19.235                     | 0.2612                                | 0.6833                                | 0.682                            | <0.001         |
| CCL4 normal                                                | -0.0102                    | 0.0087                            | 1.364                      | -0.0273                               | 0.0069                                | -                                | 0.243          |
| CCL4 lesion                                                | 0.0008                     | 0.0041                            | 0.038                      | -0.0072                               | 0.0088                                | -                                | 0.845          |
| CCL4 lesion/normal                                         | -                          | -                                 | -                          | -                                     | -                                     | -                                | 0.817          |
| CCL4 normal×CCL4 lesion×CCL4 lesion/normal                 | -                          | -                                 | -                          | -                                     | -                                     | -                                | 0.942          |
| CCL4 normal×CCL4 lesion                                    | -                          | -                                 | -                          | -                                     | -                                     | -                                | 0.439          |
| <b>Gene: CXCL2</b>                                         |                            |                                   |                            |                                       |                                       |                                  |                |
| <b>Feature</b>                                             | <b><math>\phi_i</math></b> | <b><math>\Phi_i</math><br/>SD</b> | <b>Wald<br/>statistics</b> | <b><math>\Phi_i</math><br/>95% CI</b> | <b><math>\Phi_i</math><br/>95% CI</b> | <b>Predicted<br/>probability</b> | <b>p-value</b> |
| Intercept 1 (predicted state: $\geq 20$ mm)                | -0.5729                    | 0.1287                            | 19.804                     | -0.8253                               | -0.3206                               | 0.283                            | <0.001         |
| Intercept 2 (predicted states: 10 – 19 mm or $\geq 20$ mm) | 0.6617                     | 0.1292                            | 26.227                     | 0.4084                                | 0.9149                                | 0.746                            | <0.001         |
| CXCL2 normal                                               | -0.1940                    | 0.0688                            | 7.942                      | -0.3289                               | -0.0591                               | -                                | 0.005          |
| CXCL2 lesion                                               | 0.0018                     | 0.0090                            | 0.042                      | -0.0157                               | 0.0194                                | -                                | 0.838          |
| CXCL2 lesion/normal                                        | -                          | -                                 | -                          | -                                     | -                                     | -                                | 0.269          |

| CXCL2 normal×CXCL2 lesion×CXCL2 lesion/normal         | -         | -                | -                          | -                    | -                    | -                                | 0.747          |
|-------------------------------------------------------|-----------|------------------|----------------------------|----------------------|----------------------|----------------------------------|----------------|
| CXCL2 normal×CXCL2 lesion                             | -         | -                | -                          | -                    | -                    | -                                | 0.829          |
| <b>Gene: CCL19</b>                                    |           |                  |                            |                      |                      |                                  |                |
| <b>Feature</b>                                        | <b>φi</b> | <b>Φi<br/>SD</b> | <b>Wald<br/>statistics</b> | <b>Φi<br/>95% CI</b> | <b>Φi<br/>95% CI</b> | <b>Predicted<br/>probability</b> | <b>p-value</b> |
| Intercept 1 (predicted state: ≥ 20 mm)                | -0.8176   | 0.1256           | 42.350                     | -1.0638              | -0.5713              | 0.207                            | <0.001         |
| Intercept 2 (predicted states: 10 – 19 mm or ≥ 20 mm) | 0.3926    | 0.1168           | 11.300                     | 0.1637               | 0.6216               | 0.653                            | <0.001         |
| CCL19 normal                                          | -0.0019   | 0.0053           | 0.125                      | -0.0122              | 0.0085               | -                                | 0.724          |
| CCL19 lesion                                          | 0.0250    | 0.0136           | 3.361                      | -0.0017              | 0.0518               | -                                | 0.067          |
| CCL19 lesion/normal                                   | -         | -                | -                          | -                    | -                    | -                                | 0.388          |
| CCL19 normal×CCL19 lesion×CCL19 lesion/normal         | -         | -                | -                          | -                    | -                    | -                                | 0.749          |
| CCL19 normal×CCL19 lesion                             | -         | -                | -                          | -                    | -                    | -                                | 0.494          |

SD, standard deviation; CI, confidence interval.

**Table S4.** Contingency table for chemokine protein expression in hyperplastic polyps from serrated pathway and adenomas (results of McNemar test)

| Type category       | Gene  | Condition        | Lesion (+ or ++) | Lesion (-) | p      |
|---------------------|-------|------------------|------------------|------------|--------|
| Hyperplasia         | CCL3  | Margin (+ or ++) | 1 [0.25]         | 0 [0.00]   | 0.2500 |
|                     |       | Margin (-)       | 3 [0.75]         | 0 [0.00]   |        |
|                     | CCL4  | Margin (+ or ++) | 1 [0.25]         | 1 [0.25]   | 1.0000 |
|                     |       | Margin (-)       | 0 [0.00]         | 2 [0.50]   |        |
|                     | CXCL2 | Margin (+ or ++) | 4 [1.00]         | 0 [0.00]   | -      |
|                     |       | Margin (-)       | 0 [0.00]         | 0 [0.00]   |        |
|                     | CCL19 | Margin (+ or ++) | 3 [1.00]         | 0 [0.00]   | -      |
|                     |       | Margin (-)       | 0 [0.00]         | 0 [0.00]   |        |
| Adenoma (all types) | CCL3  | Margin (+ or ++) | 23 [0.40]        | 5 [0.09]   | 0.0061 |
|                     |       | Margin (-)       | 19 [0.33]        | 10 [0.18]  |        |
|                     | CCL4  | Margin (+ or ++) | 41 [0.71]        | 6 [0.10]   | 0.6072 |
|                     |       | Margin (-)       | 9 [0.16]         | 2 [0.03]   |        |
|                     | CXCL2 | Margin (+ or ++) | 0 [0.00]         | 2 [0.03]   | 0.0225 |
|                     |       | Margin (-)       | 11 [0.19]        | 45 [0.78]  |        |
|                     | CCL19 | Margin (+ or ++) | 51 [0.88]        | 0 [0.00]   | 0.0156 |
|                     |       | Margin (-)       | 7 [0.12]         | 0 [0.00]   |        |
